# Supplementary material
Source: Springer Nature journal article supplement (https://www.springermedizin.de/resource/supplementary/12879_2001_29_MOESM4_ESM.pdf/9448062)

A.

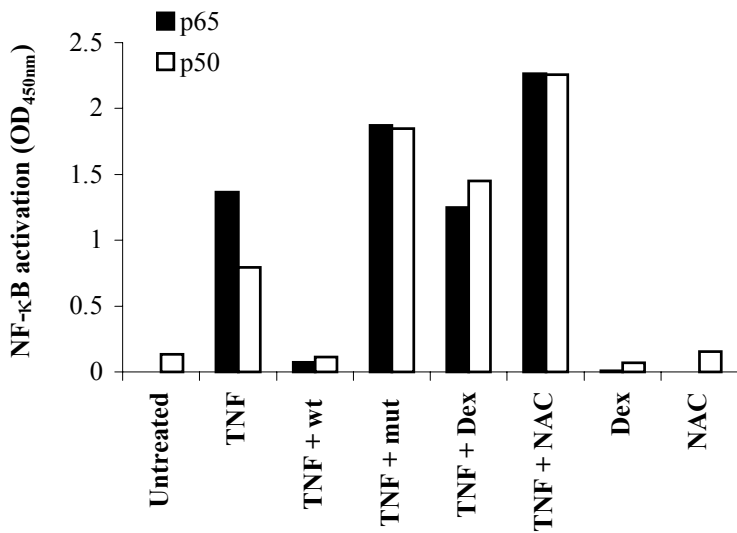

B.

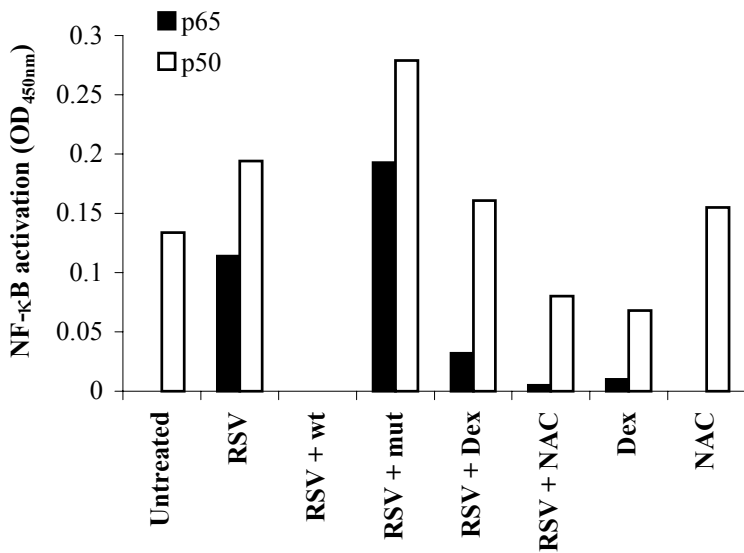

Supplement: MOESM4 [file 9448062]
